# Supplementary material
Source: Springer Nature journal article supplement (https://www.springermedizin.de/resource/supplementary/12943_2010_799_MOESM4_ESM.pdf/9554860)

A

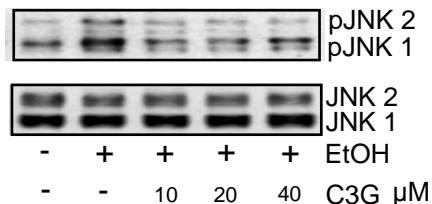

B IP: JNK

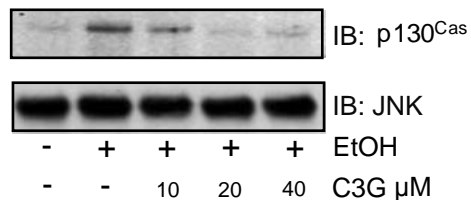

C

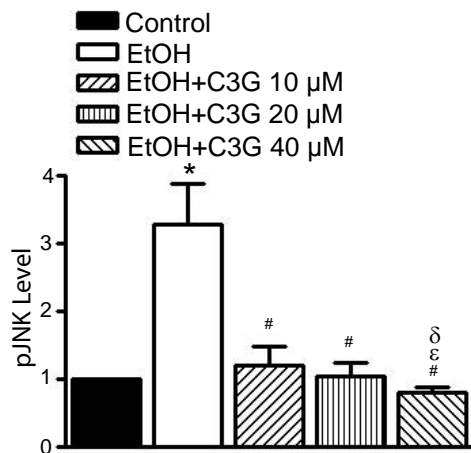

D

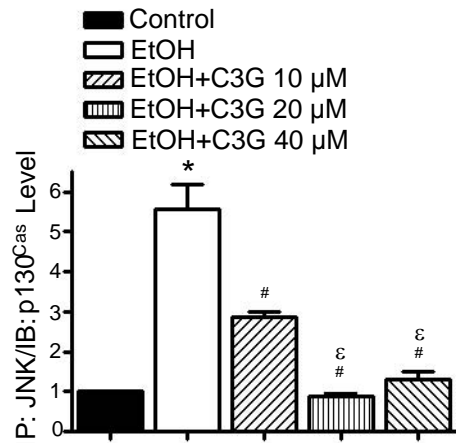

Supplement: MOESM4 [file 9554860]
